# Supplementary material
Source: PubMed Central journal article supplement (PMC4512849)
Supplement: NIHMS697390-supplement-Supplemental_Material.pdf [file NIHMS697390-supplement-Supplemental_Material.pdf]

Supplemental Figure 1: Relationship of Jugular venous pressure (JVP) to event rates at baseline (a) and discharge (b)

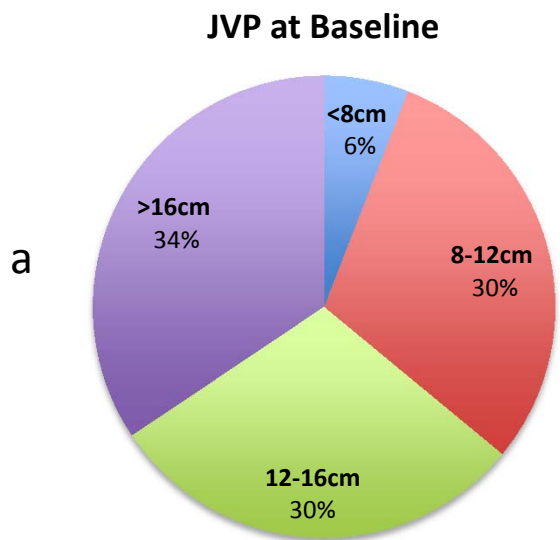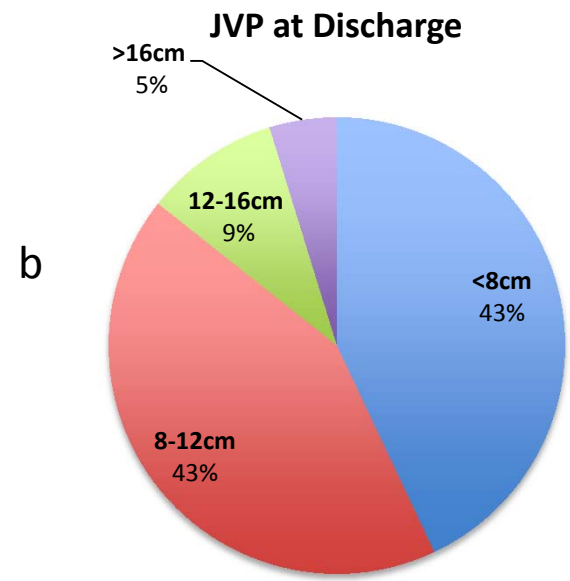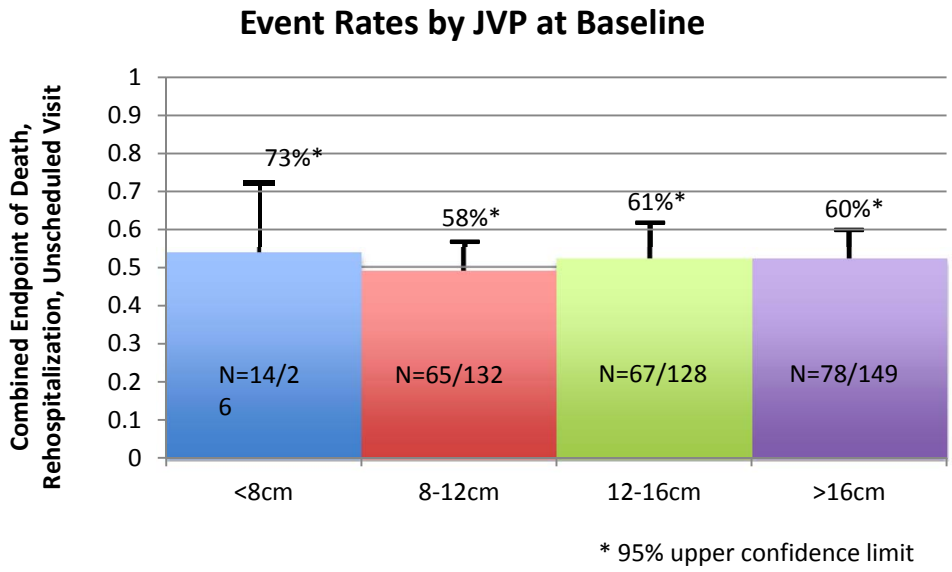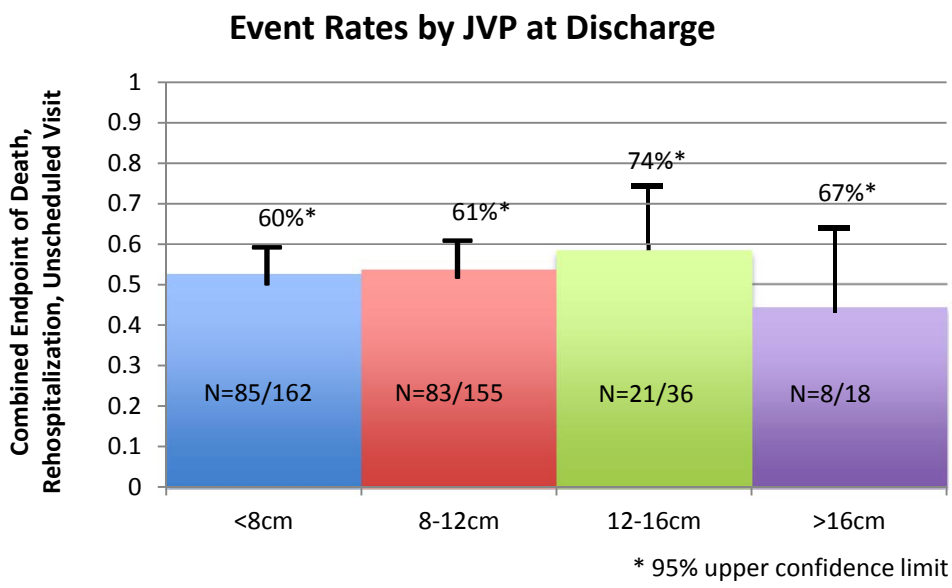

# Supplemental Figure 2a: Relationship of orthopnea and edema at baseline to event rates

### Orthopnea at Baseline

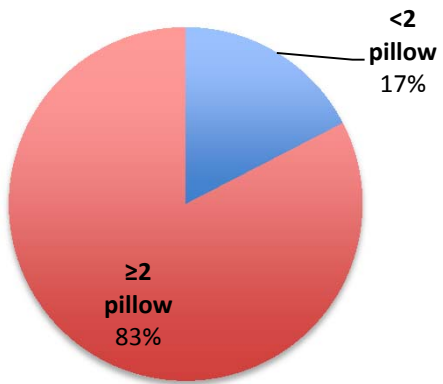

### Event Rates by Orthopnea at Baseline

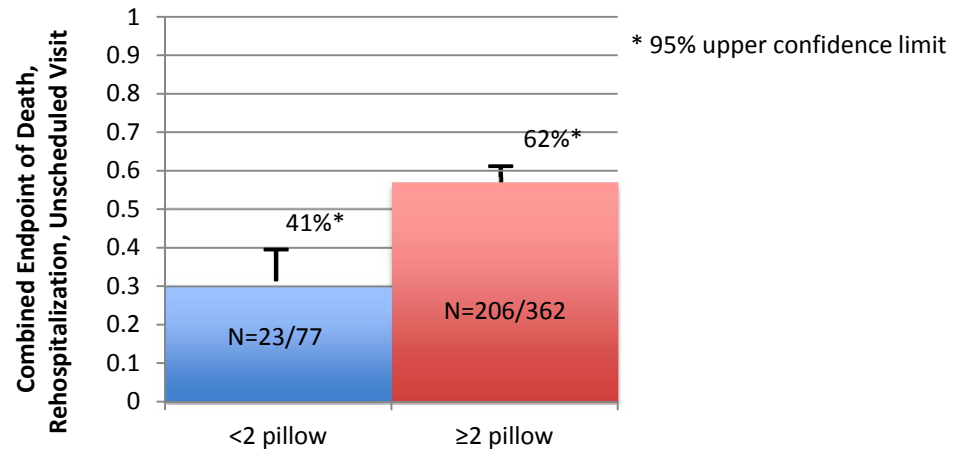

### Edema at Baseline

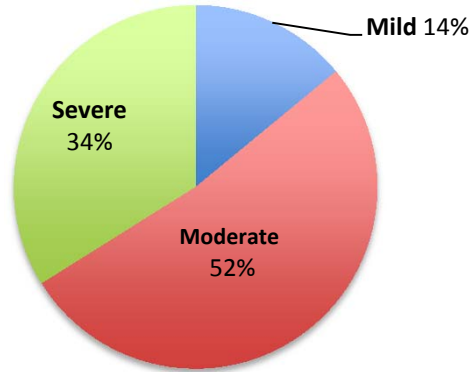

### Event Rates by Edema at Baseline

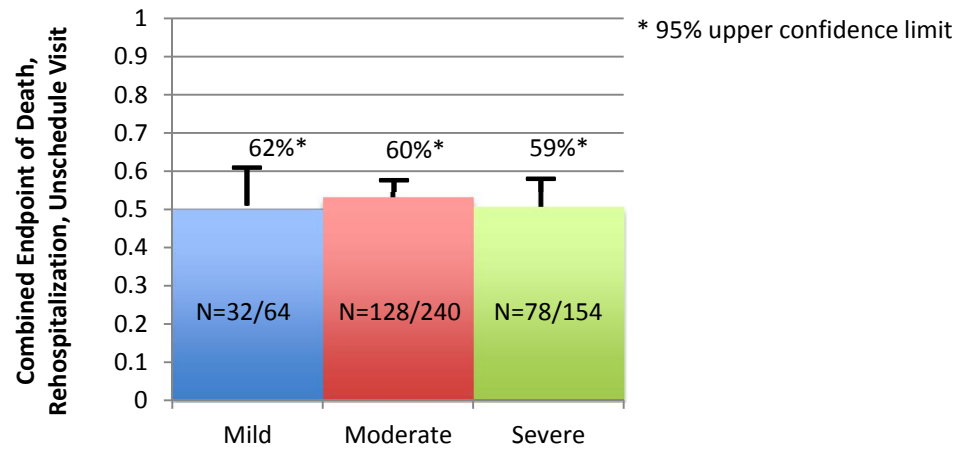

# Supplemental Figure 2b Relationship of orthopnea and edema at discharge to event rates

### Orthopnea at Discharge

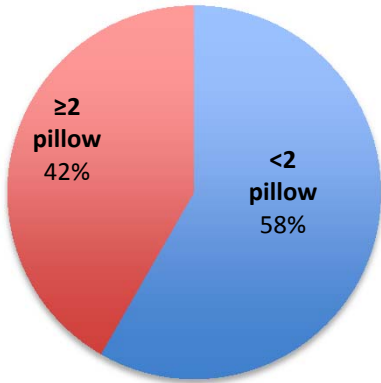

### Event Rates by Orthopnea at Discharge

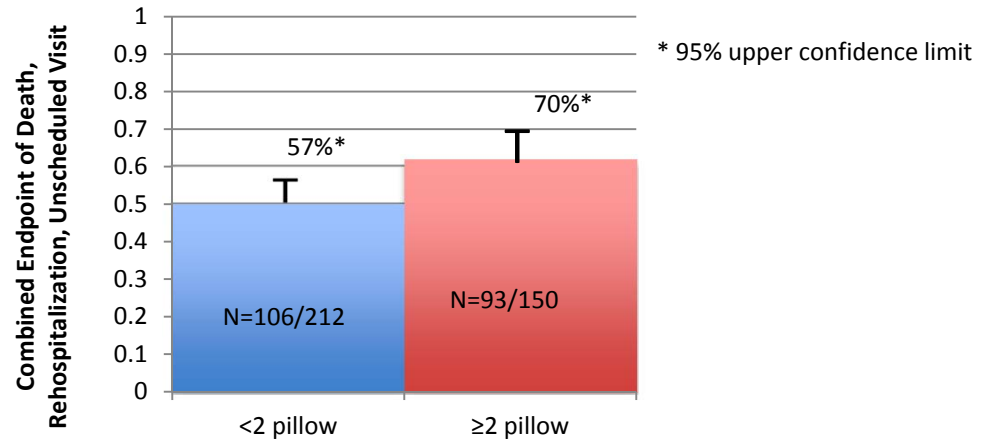

### Edema at Discharge

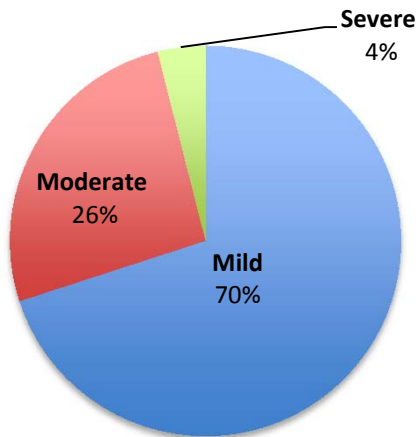

### Event Rates by Edema at Discharge

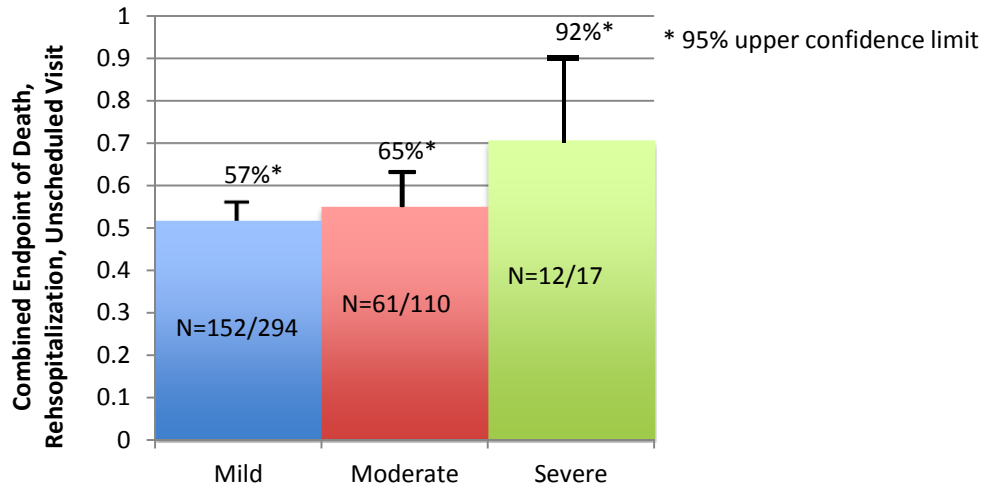

## NHLBI Heart Failure Network Steering Committee Members

| Name                     | Title                  | Affiliation                                        |
|--------------------------|------------------------|----------------------------------------------------|
| Eugene Braunwald         | Study Chairman         | Harvard University                                 |
| Monica Shah              | Program Officer        | NHLBI                                              |
| Patrice Desvigne-Nickens | Deputy Program Officer | NHLBI                                              |
| Kevin Anstrom            | Principal Investigator | Duke University (Coordinating Center)              |
| Adrian Hernandez         | Principal Investigator | Duke University (Coordinating Center)              |
| Thomas Cappola           | Principal Investigator | University of Pennsylvania                         |
| Kenneth Margulies        | Principal Investigator | University of Pennsylvania                         |
| Wilson Tang              | Principal Investigator | Cleveland Clinic Lerner College of Medicine - CWRU |
| Randall Starling         | Principal Investigator | Cleveland Clinic Lerner College of Medicine –CWRU* |
| G. Michael Felker        | Principal Investigator | Duke University Medical Center                     |
| Michael Givertz          | Principal Investigator | Brigham and Women’s Hospital                       |
| Marc Semigran            | Principal Investigator | Massachusetts General Hospital                     |

|                      |                        |                                                  |
|----------------------|------------------------|--------------------------------------------------|
| Margaret M. Redfield | Principal Investigator | Mayo Clinic Rochester                            |
| Victor Davila-Roman  | Principal Investigator | Washington University                            |
| Douglas Mann         | Principal Investigator | Washington University                            |
| David Whellan        | Principal Investigator | Thomas Jefferson University                      |
| Peter VanBuren       | Principal Investigator | University of Vermont-Fletcher Allen Health Care |
| Gordon Huggins       | Principal Investigator | Tufts New England Medical Center                 |
| Andrew Smith         | Principal Investigator | Emory University                                 |
